# Supplementary material
Source: PubMed Central journal article supplement (PMC4411213)
Supplement: NIHMS680921-supplement-Supplemental_2.pdf [file NIHMS680921-supplement-Supplemental_2.pdf]

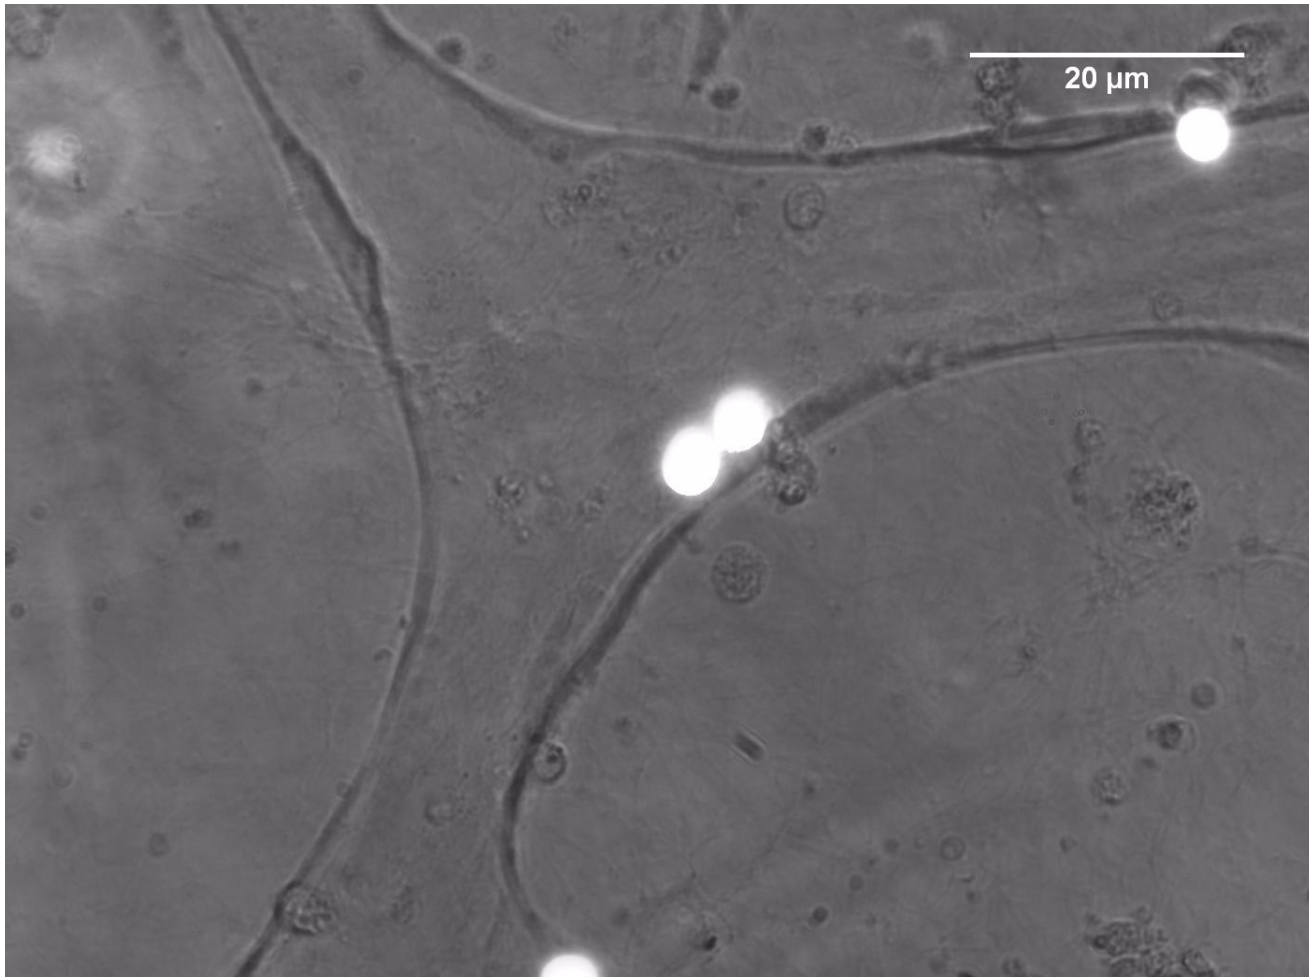

**Supplemental Movie 1. iPSC-EC encapsulated in 3D using custom bioreactor.** Tubules were perfused with 4μm microparticles. Time interval: 105ms.
